# Supplementary material
Source: PubMed Central journal article supplement (PMC9074404)
Supplement: bloodBLD2021014255-suppl1.pdf [file bloodBLD2021014255-suppl1.pdf]

Figure S1. Consort flow diagram.

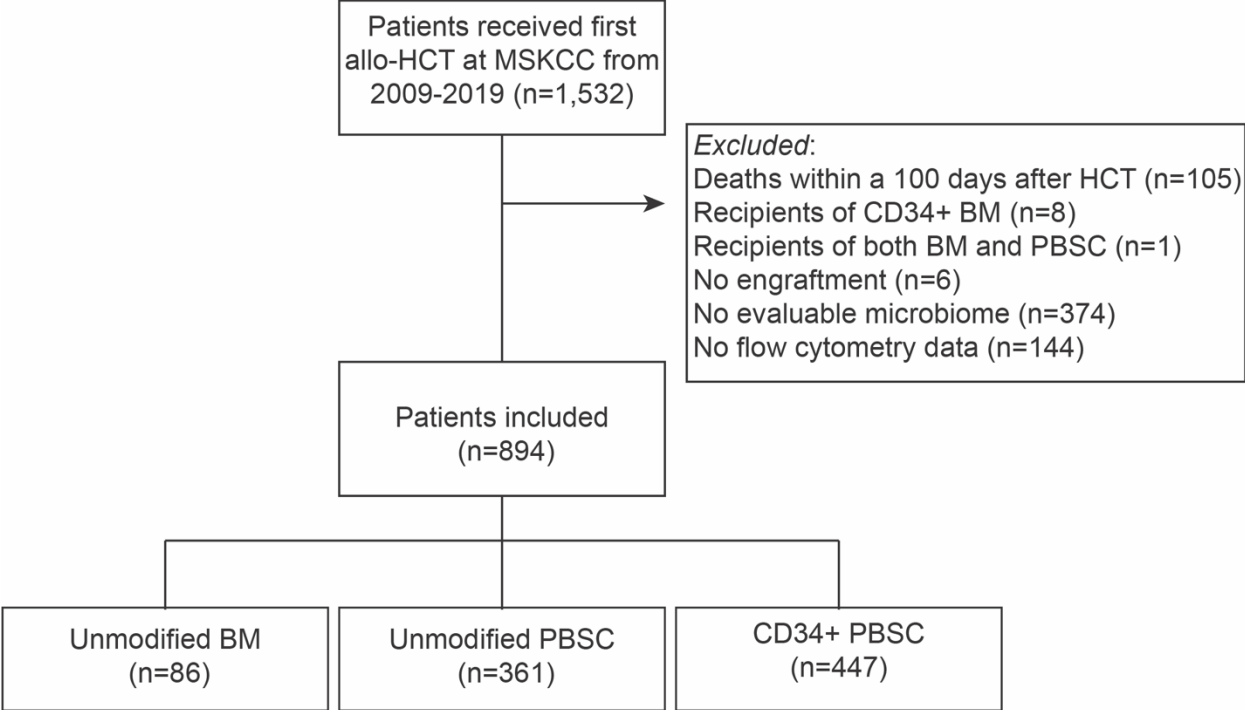

Allo-HCT: allogeneic hematopoietic cell transplant; BM: Bone marrow transplant; PBSC: Peripheral blood stem cell transplant.

**Figure S2.** Day 100 CD4 counts by GVHD prophylaxis regimen. Lower limit of normal (LLN) = 429; upper limit of normal (ULN) = 1,331 cells/ $\mu$ l.

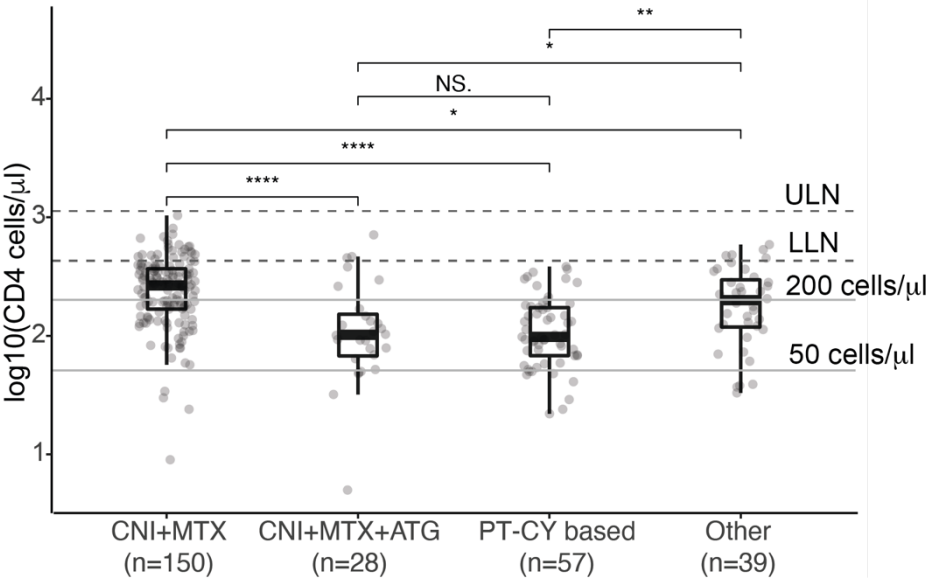

**Figure S3. A-diversity per graft type (a) over time and (b) summarized at peri-engraftment period.** Patients included: n=894 total, **(a)** Patients with available stool samples between day -30 and +40 from allo-HCT were included: 86 BM; 361 unmodified PBSC; 447 CD34+ PBSC. **(b)** Patients with available stool samples during the peri-engraftment period were included: 74 BM; 270 PBSC and 323 CD34+ selected. Median peri-engraftment  $\alpha$ -diversity was calculated per patient. HCT: hematopoietic cell transplant; BM: Bone marrow transplant; PBSC: Peripheral blood stem cell transplant.

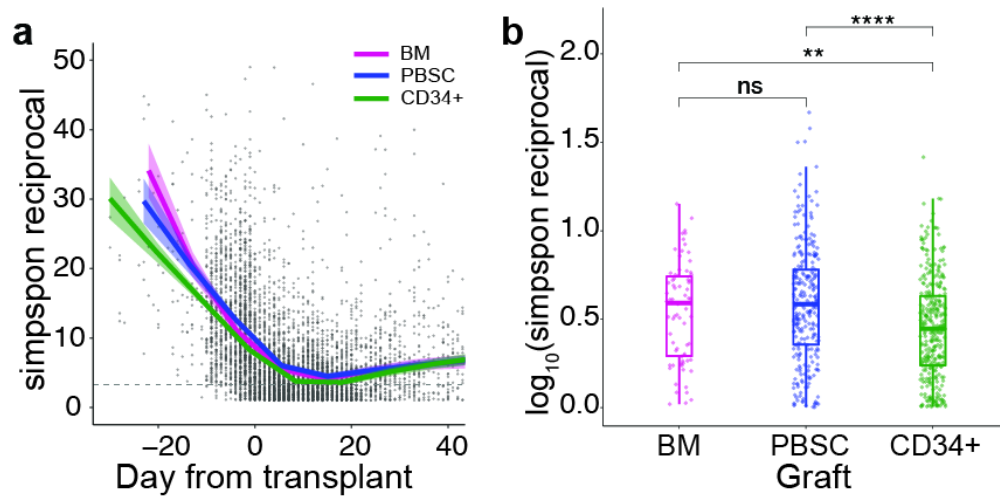

**Figure S4:** CD4 counts at day 100 and clinical outcomes after allo-HCT. CD4 recovery was defined as high, moderate and low using thresholds at 25<sup>th</sup> and 75<sup>th</sup> percentile at day 100 by graft type. **(a-b)** Overall survival for **(a)** BM, **(b)** PBSC and **(c)** CD34-selected PBSC recipients. **(d-f)** Cumulative incidence of non-relapse mortality of **(d)** BM, **(e)** PBSC and **(f)** CD34-selected PBSC recipients. HCT: allogeneic hematopoietic cell transplant; BM: bone marrow transplant; PBSC: peripheral blood stem cell transplant.

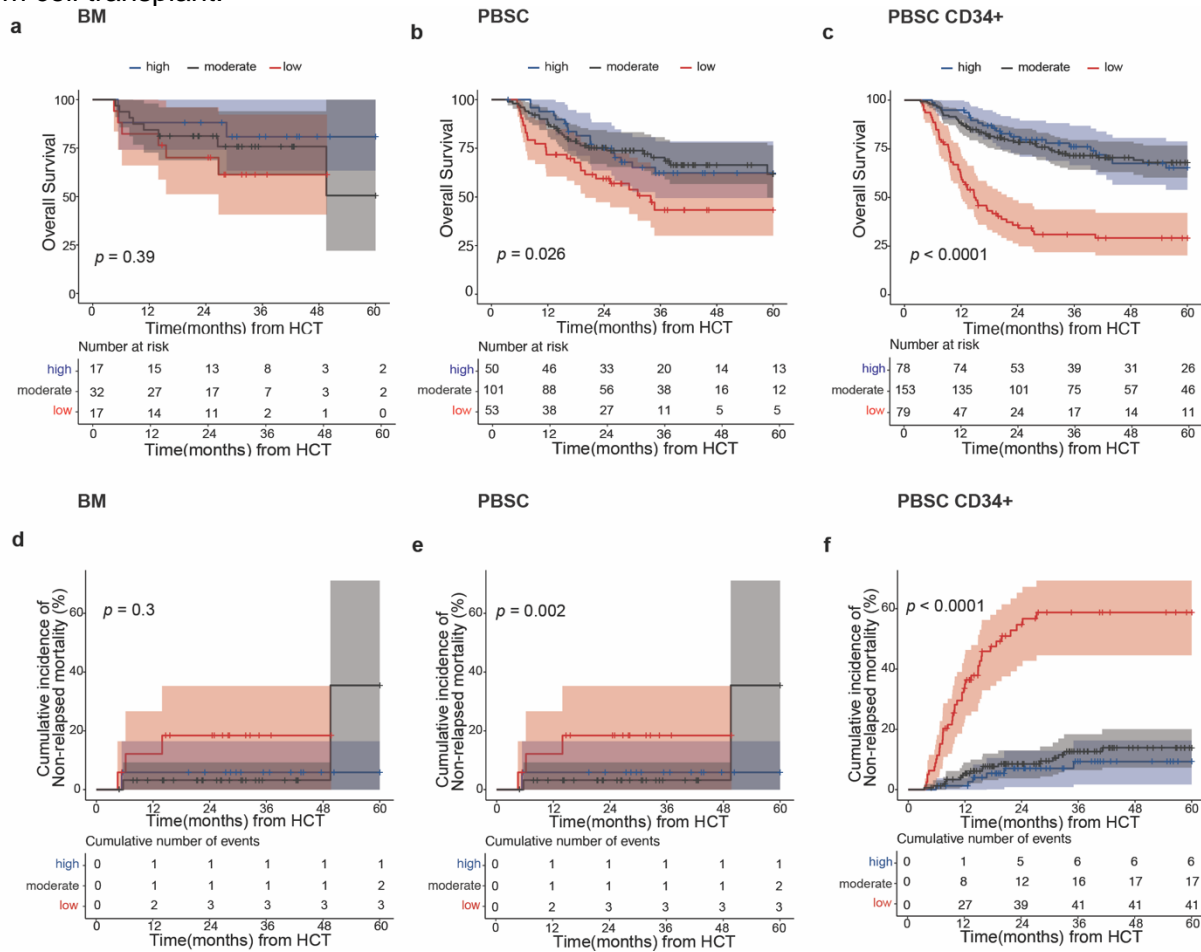

**Figure S5.** Overall survival (**a-c**) and non-relapse mortality (**d-f**) in patients with high and low peri-engraftment  $\alpha$ -diversity in recipients of BM (**a,d**), PBSC (**b,e**) and CD34-selected PBSC (**c,f**).

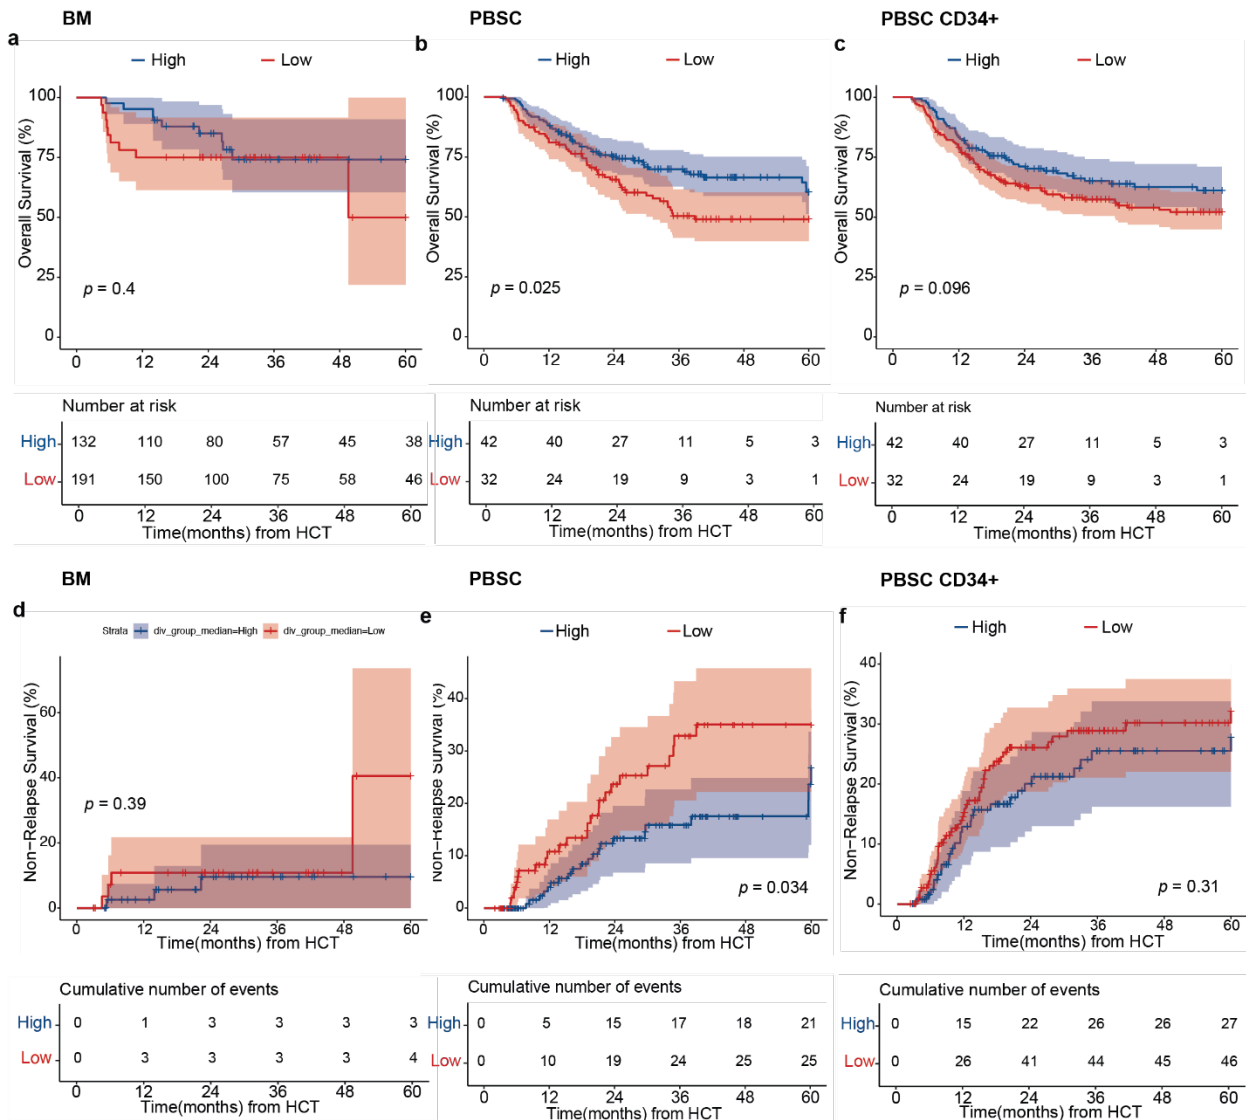

**Figure S6: (a)** Evaluation of the sensitivity of the MaAsLin2 results to selection of prevalence, abundance and minimum read depth thresholds. The association between Staphylococcus and CD4 count is detected across a range of reasonable thresholds. Above a minimum sample depth of ~10,000, too many samples are excluded to detect significant associations. Similarly, the absolute value of the coefficient decreases. The histogram in panel **(b)** shows the distribution of depths in this study, indicating the depth thresholds considered for this sensitivity analysis. The table in panel **(b)** shows the number of samples retained according to the various depth thresholds (assuming no prevalence of abundance filtering). **(c)** CD4 counts in patients with high and low Staphylococcus abundance (using the 75<sup>th</sup> percentile) in a univariate analysis. Lower limit of normal (LLN) = 429; upper limit of normal (ULN) = 1,331 cells/ml.

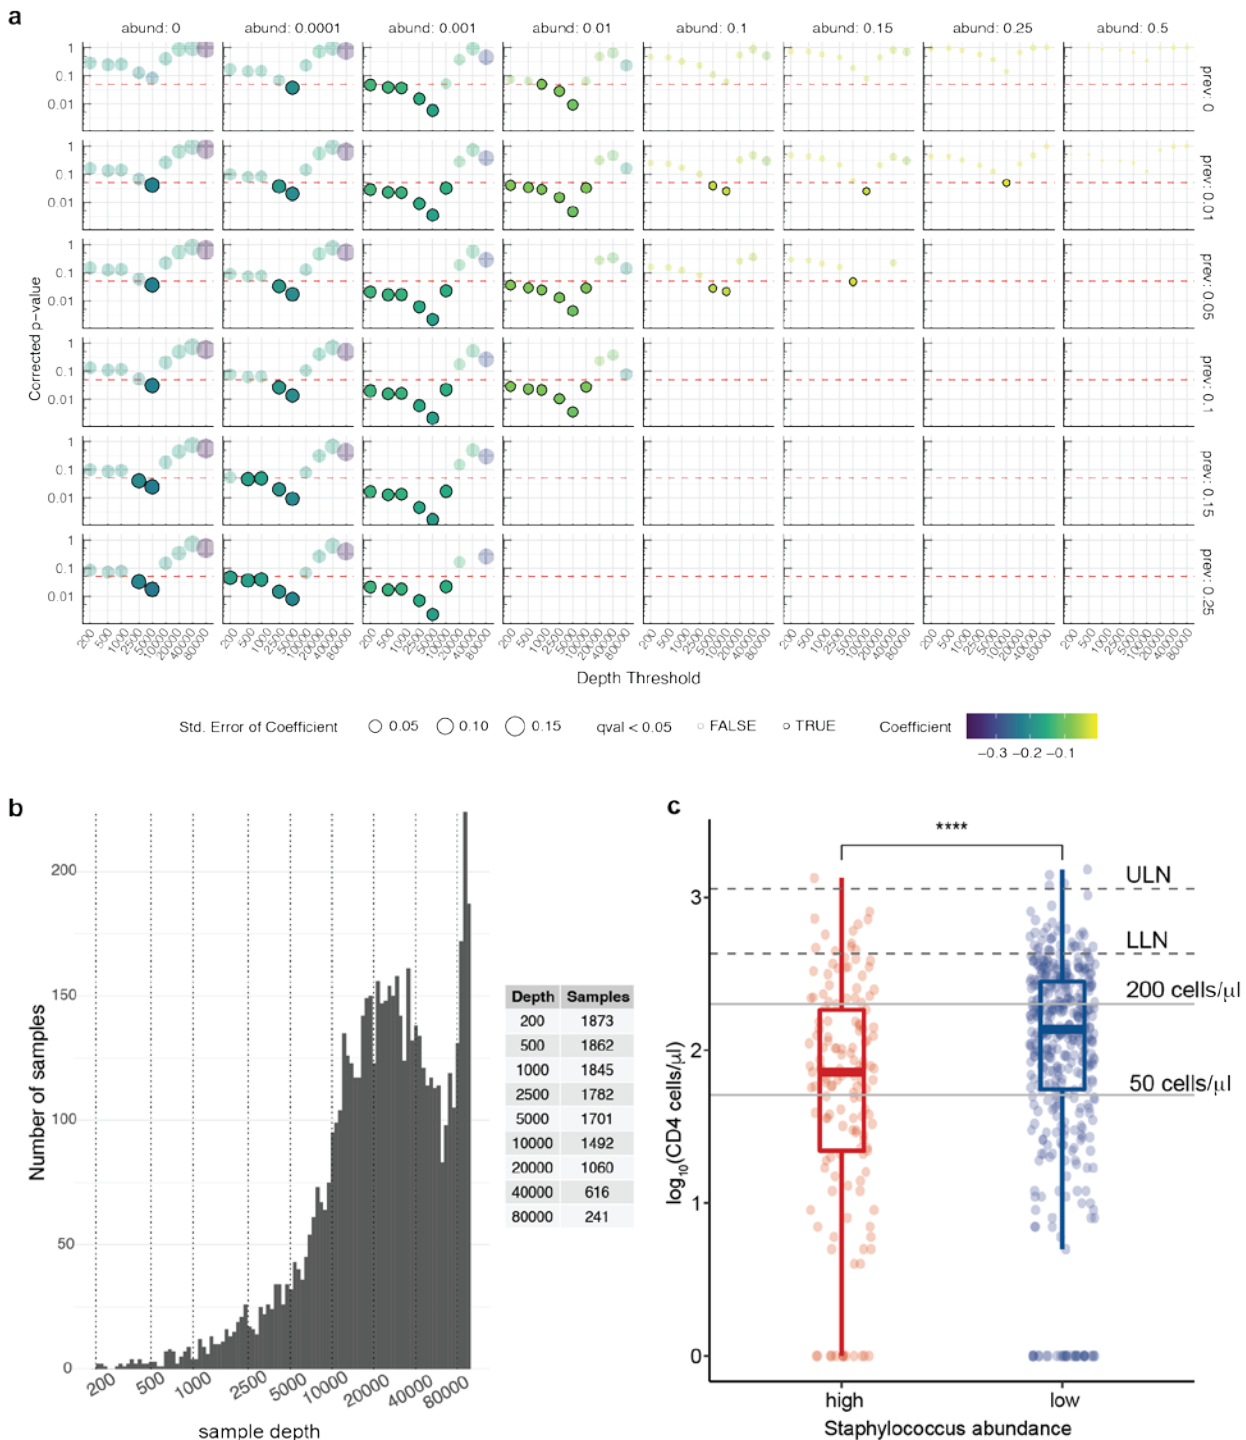

**Table S1.** Conditioning, Donor type and GvHD prophylaxis medications.

|                                                  | <b>BM<br/>(n=86)</b> | <b>PBSC<br/>(n=361)</b> | <b>PBSC CD34+<br/>(n=447)</b> | <b>All<br/>(n=894)</b> |        |
|--------------------------------------------------|----------------------|-------------------------|-------------------------------|------------------------|--------|
| <b>Conditioning</b>                              |                      |                         |                               |                        | <0.001 |
| Ablative                                         | 49 (57.0)            | 97 (26.9)               | 446 (99.8)                    | 589 (65.9)             |        |
| Non-ablative                                     | 15 (17.4)            | 99 (27.4)               | 0 (0)                         | 114 (12.8)             |        |
| Reduced intensity                                | 22 (25.6)            | 165 (45.7)              | 1 (0.2)                       | 191 (21.4)             |        |
| <b>Donor type</b>                                |                      |                         |                               |                        | <0.001 |
| Matched related                                  | 17 (19.8)            | 124 (34.3)              | 147 (32.9)                    | 288 (32.2)             |        |
| Mismatched related                               | 0 (0)                | 2 (0.6)                 | 2 (0.4)                       | 4 (0.4)                |        |
| Haploidentical                                   | 24 (27.9)            | 20 (5.5)                | 0 (0)                         | 44 (4.9)               |        |
| Matched unrelated                                | 34 (39.5)            | 187 (51.8)              | 226 (50.6)                    | 447 (50.0)             |        |
| Mismatched non-related                           | 11 (12.8)            | 28 (7.8)                | 72 (16.1)                     | 111(12.4)              |        |
| <b>GvHD prophylaxis regimen</b>                  |                      |                         |                               |                        | <0.001 |
| CNI + MMF, n (%)                                 | 0 (0)                | 5 (1.4)                 | 1 (0.2)                       | 6 (0.7)                |        |
| CNI + MTX, n (%)                                 | 34 (39.5)            | 228 (63.2)              | 0 (0)                         | 262 (29.3)             |        |
| CNI + MTX + ATG, n (%)                           | 5 (5.8)              | 35 (9.7)                | NA*                           | 40 (4.5)               |        |
| Post-transplant<br>cyclophosphamide-based, n (%) | 41 (47.7)            | 36 (10.0)               | 1 (0.2)                       | 78 (8.7)               |        |
| Others, n (%)                                    | 6 (7.0)              | 57 (15.8)               | 10 (2.2)                      | 72 (8.1)               |        |
| CD34-selection,<br>No additional drugs, n (%)    | 0 (0)                | 0 (0)                   | 435 (97.3)                    | 436 (48.8)             |        |

Others included: CNI monotherapy (n=9), CNI + sirolimus (n=4), CNI +/- sirolimus + MMF + MTX (n=57), CNI/sirolimus + MMF + MTX + ATG (n=2). Six patients that received a PT-CY-based regimen also received ATG.

GvHD: graft versus host disease, BM: Bone marrow transplant; PBSC: Peripheral blood stem cell transplant, CNI: calcineurin inhibitor, MMF: mycophenolate mofetil, MTX: methotrexate

**Table S2.** High dose (HD) steroids: defined as equal or more than 1mg/kg of prednisone-equivalent given for 7-days continuously between HCT day and flow cytometry test in peri-100 and peri-180 day periods.

|                           | <b>BM</b> | <b>PBSC</b> | <b>PBSC CD34+</b> | <b>All</b> |
|---------------------------|-----------|-------------|-------------------|------------|
| <b>Peri-100 day</b>       | (n=73)    | (n=270)     | (n=429)           | (n=772)    |
| <b>HD steroids, n (%)</b> | 21 (29)   | 88 (33)     | 60 (14)           | 169 (22)   |
| <b>Peri-180 day</b>       | (n=63)    | (n=262)     | (n=390)           | (n=715)    |
| <b>HD steroids, n (%)</b> | 21 (32)   | 88 (31)     | 65 (15)           | 174 (24)   |

HCT: allogeneic hematopoietic cell transplant; BM: Bone marrow transplant; PBSC: Peripheral blood stem cell transplant.



**Table S3.** High dose (HD) steroids: defined as any dose equal or more than 1mg/kg of prednisone equivalent, given at least once, 7-days before the flow cytometry in peri-100 and peri-180 day periods.

|                          | <b>BM</b> | <b>PBSC</b> | <b>PBSC CD34+</b> | <b>All</b> |
|--------------------------|-----------|-------------|-------------------|------------|
| <b>Peri-100 day</b>      | (n=83)    | (n=284)     | (n=465)           | (n=823)    |
| <b>HD steroids n (%)</b> | 2 (2.4)   | 3 (1.1)     | 4 (0.9)           | 9 (1.1)    |
| <b>Peri-180 day</b>      | (n=63)    | (n=262)     | (n=390)           | (n=715)    |
| <b>HD steroids n (%)</b> | 0 (0)     | 3 (1.1)     | 2 (0.5)           | 5 (0.7)    |

HCT: allogeneic hematopoietic cell transplant; BM: Bone marrow transplant; PBSC: Peripheral blood stem cell transplant.

**Table S4.** Lymphocyte subset counts.

|      | All<br>(cells/ml) | BM  | PBSC | CD34+ |
|------|-------------------|-----|------|-------|
| CD4  | 153               | 114 | 227  | 61    |
| CD8  | 112               | 89  | 225  | 48    |
| CD19 | 212               | 47  | 59   | 287   |
| NK   | 247               | 212 | 180  | 322   |

**Table S5.** Engraftment day and median peri-engraftment diversity per graft source.

|            | Median<br>Engraftment day | Median<br>peri-engraftment diversity<br>(simpson reciprocal) |
|------------|---------------------------|--------------------------------------------------------------|
| BM         | 17 (+/- 4.6 SD)           | 4.0 (+/- 2.8 SD)                                             |
| PBSC       | 12 (+/- 4.1 SD)           | 3.8 (+/- 5.6 SD)                                             |
| CD34+ PBSC | 10 (+/- 1.0 SD)           | 2.8 (+/- 2.5 SD)                                             |
| All        | 11 (+/-3.6 SD)            | 3.3 (+/- 4.0 SD)                                             |

BM: Bone marrow transplant; PBSC: Peripheral blood stem cell transplant; SD: standard deviation. *Patients receiving CD34+ PBSC had statistically significantly lower diversity than patients receiving PBSC (p-val <0.001) or BM (p-val=0.002); however, patients receiving either PBSC or BM had similar median diversity (p-val=0.8).*

**Table S6.** Clinical characteristics of patients with high and low Staphylococcus abundance (higher or lower than 75<sup>th</sup> percentile) in the peri-engraftment period.

|                          | Staphylococcus abundance |                 | p-val  |
|--------------------------|--------------------------|-----------------|--------|
|                          | Low<br>(n=450)           | High<br>(n=155) |        |
| <b>Age: median (IQR)</b> | 58 (47, 66)              | 57 (50, 64)     | 0.6    |
| <b>Sex: males, n (%)</b> | 274 (61)                 | 90 (58)         | 0.5    |
| <b>Disease</b>           |                          |                 |        |
| <b>Lymphoma</b>          | 79 (18)                  | 10 (6.5)        | 0.004  |
| <b>MDS/MPN</b>           | 106 (24)                 | 39 (25)         |        |
| <b>Leukemia</b>          | 215 (48)                 | 87 (56)         |        |
| <b>Multiple Myeloma</b>  | 40 (8.9)                 | 18 (12)         |        |
| <b>Non-malignant</b>     | 10 (2.2)                 | 1 (0.6)         |        |
| <b>Intensity</b>         |                          |                 |        |
|                          |                          |                 | <0.001 |
| <b>Reduced intensity</b> | 92 (20)                  | 19 (13)         |        |
| <b>Non-ablative</b>      | 59 (13)                  | 6 (3.9)         |        |
| <b>Ablative</b>          | 299 (66)                 | 129 (83)        |        |
| <b>Graft</b>             |                          |                 |        |
|                          |                          |                 | <0.001 |
| <b>BM</b>                | 50 (11)                  | 18(12)          |        |
| <b>PBSC</b>              | 180 (40)                 | 29 (19)         |        |
| <b>CD34-selected</b>     | 220 (49)                 | 108 (70)        |        |
| <b>Overall GVHD</b>      |                          |                 |        |
|                          | 179 (39.8)               | 62 (40)         | 0.3    |
| <b>Grade 0-1</b>         | 318 (70.7)               | 104 (67.1)      |        |
| <b>Grade 2-4</b>         | 132 (29.3)               | 51 (32.9)       |        |
| <b>Lower gut GVHD</b>    |                          |                 |        |
|                          | 43 (9.6)                 | 12 (7.7)        | 0.4    |
| <b>Grade 0-1</b>         | 433 (96.2)               | 148 (95.5)      |        |
| <b>Grade 2-4</b>         | 17 (3.8)                 | 7 (4.5)         |        |
